# Supplementary material for: ECT2 overexpression promotes the polarization of tumor-associated macrophages in hepatocellular carcinoma via the ECT2/PLK1/PTEN pathway
Source: PubMed Central journal article supplement (PMC7870664; doi:10.1038/s41419-021-03450-z), 2021-02-08

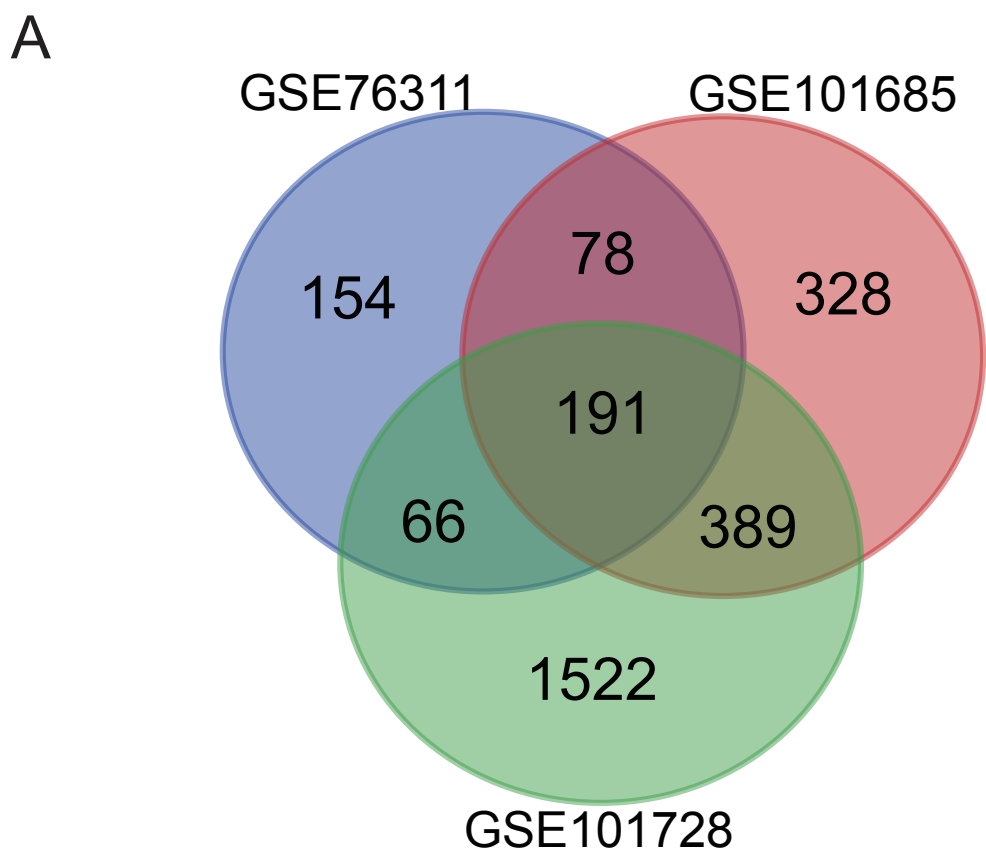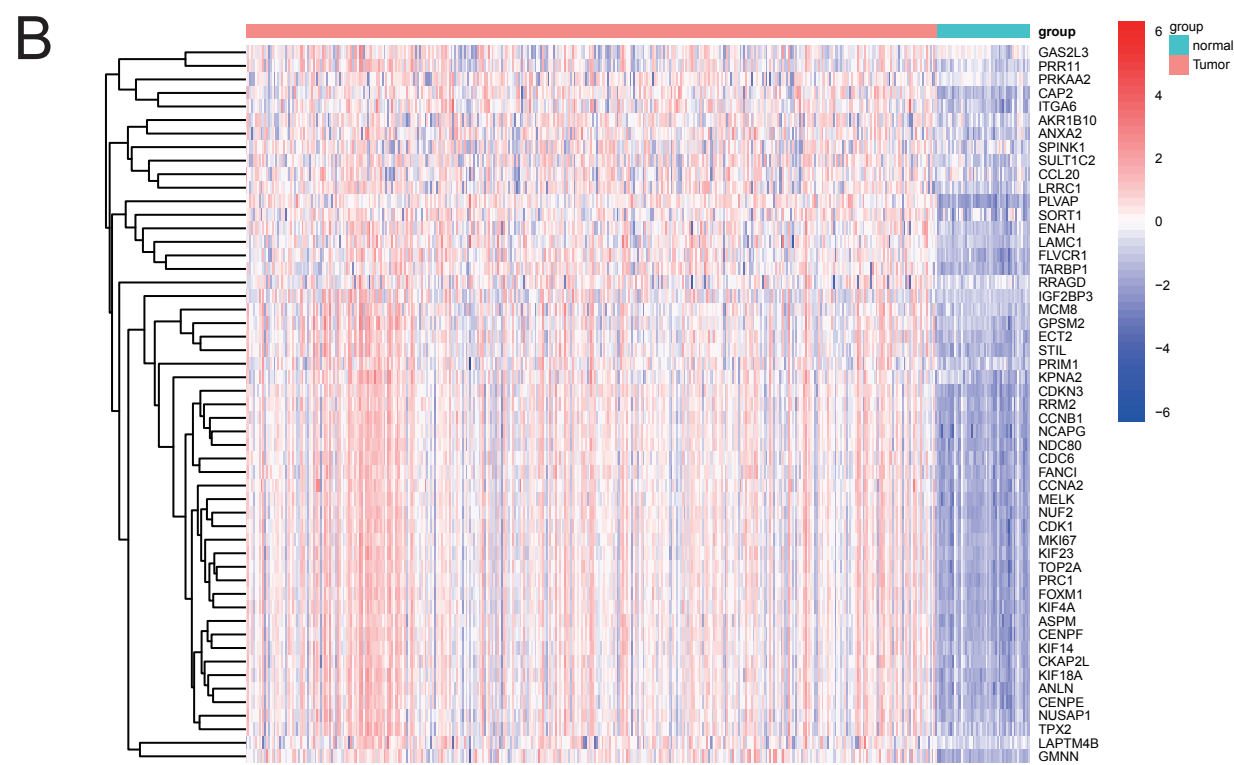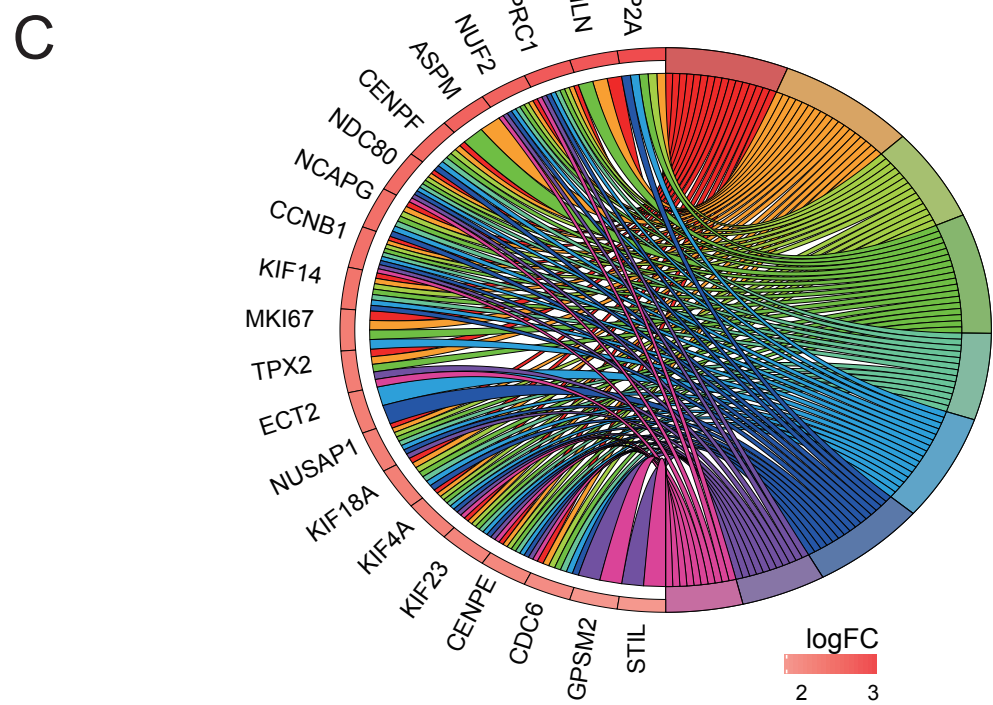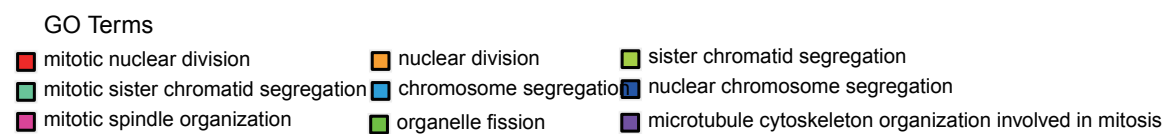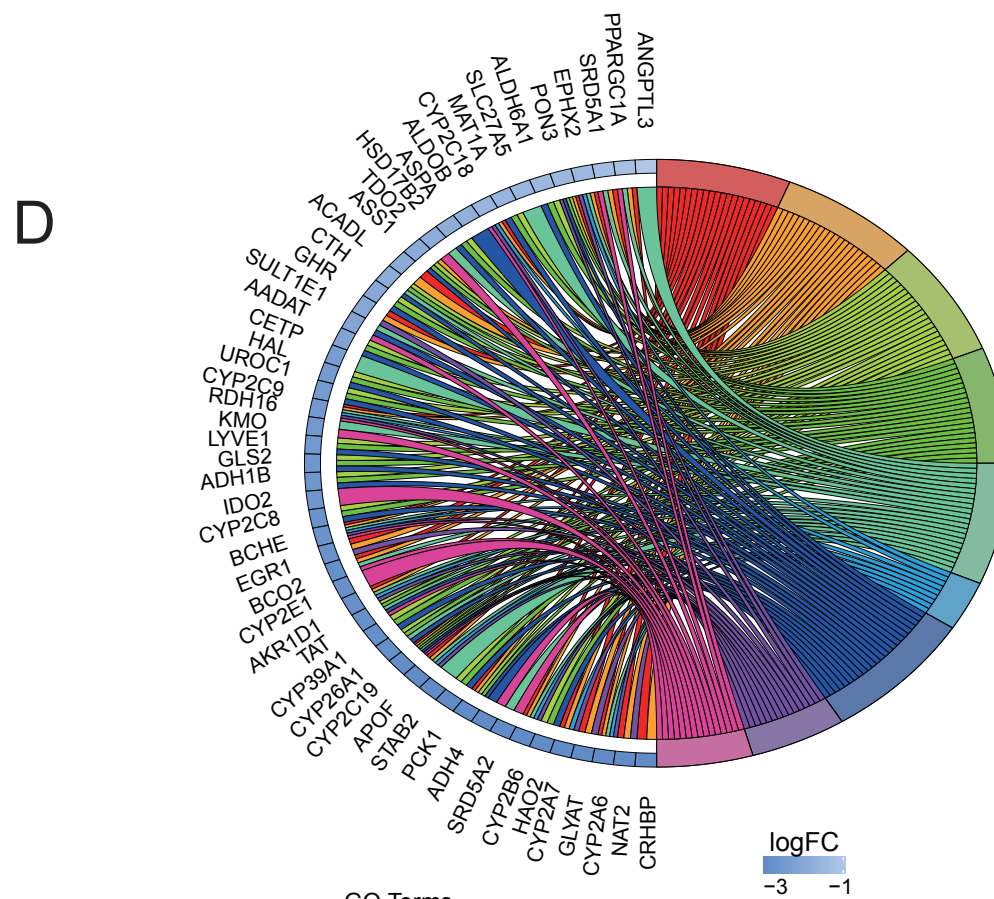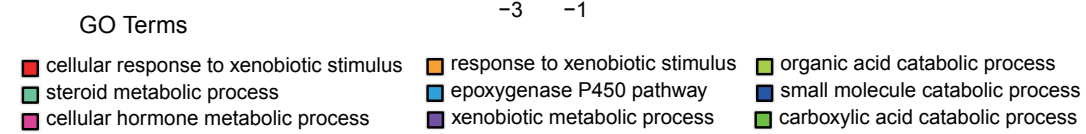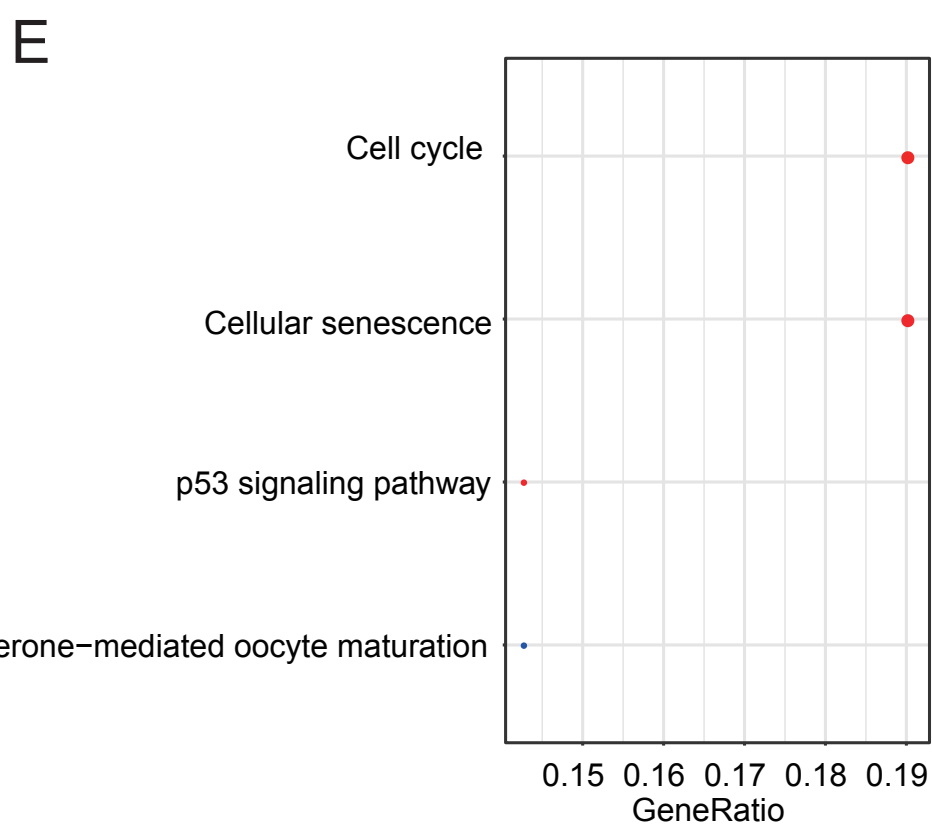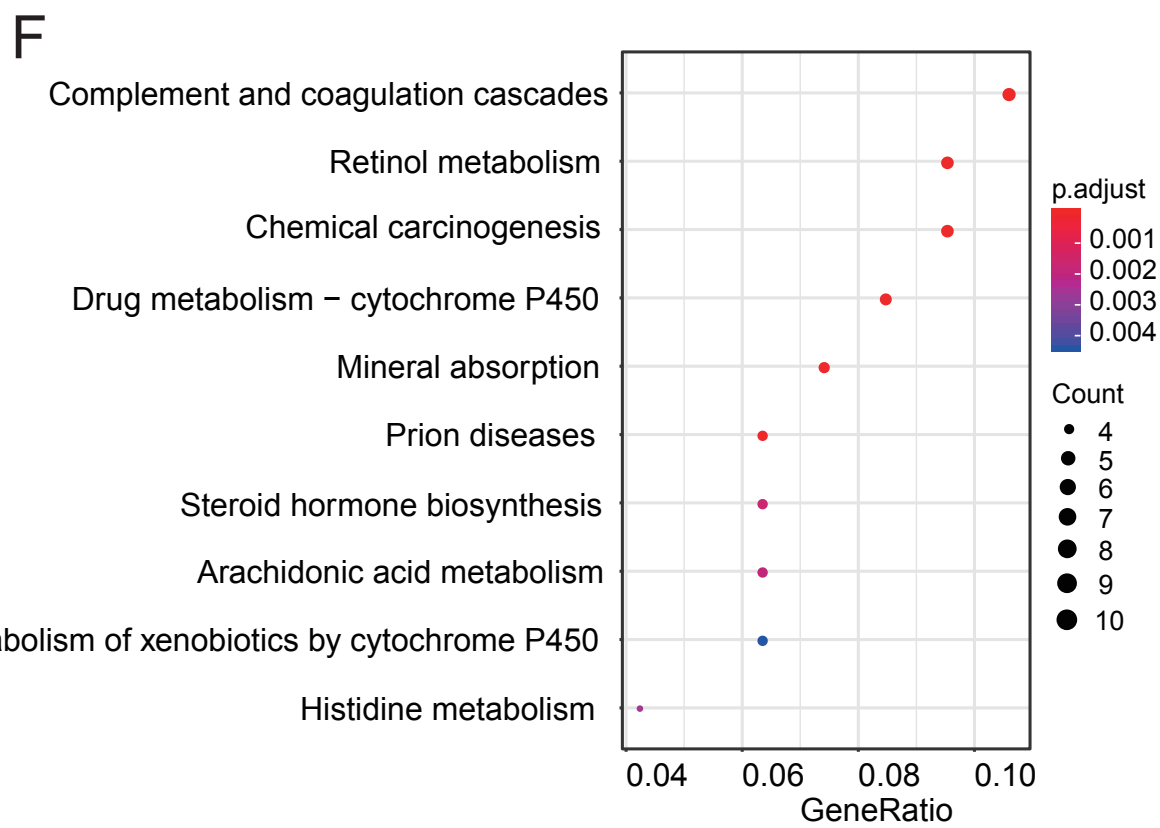

Supplement: 41419_2021_3450_MOESM5_ESM.pdf [file 41419_2021_3450_MOESM5_ESM.pdf]
